# Supplementary material for: A new neuropeptide insect parathyroid hormone iPTH in the red flour beetle Tribolium castaneum
Source: PubMed Central journal article supplement (PMC7224569; doi:10.1371/journal.pgen.1008772), 2020-05-04
Supplement: pgen.1008772.s012.pdf [file pgen.1008772.s012.pdf]

**Dataset\_S1. The genes down-regulated in RNAseq of the RNAi samples for Tc-iPTHR1 and Tc-iPTHR2.**

| GeneID                                                                  | Gene name - blast                                                          | log2(dsiPTHR1/C) | log2(dsiPTHR2/C)2 | C-RPKM  | dsiPTHR1-RPKM | dsiPTHR2-RPKM |
|-------------------------------------------------------------------------|----------------------------------------------------------------------------|------------------|-------------------|---------|---------------|---------------|
| <b>Extracellular structural components including cuticular proteins</b> |                                                                            |                  |                   |         |               |               |
| TC000369                                                                | Larval/pupal cuticle protein H1C                                           | -16.81           | -7.78             | 114.94  | 0.00          | 0.52          |
| TC003055                                                                | Cuticle protein 65                                                         | -16.50           | -6.45             | 92.76   | 0.00          | 1.06          |
| TC001177                                                                | Larval/pupal cuticle protein H1C-like Protein                              | -16.29           | -6.36             | 80.35   | 0.00          | 0.98          |
| TC003599                                                                | Pupal cuticle protein C1B                                                  | -14.94           | -14.94            | 31.40   | 0.00          | 0.00          |
| TC013817                                                                | Pupal cuticle protein Edg-84A-like Protein                                 | -14.52           | -5.15             | 23.47   | 0.00          | 0.66          |
| TC003834                                                                | Pupal cuticle protein Edg-78E-like Protein                                 | -14.35           | -14.35            | 20.84   | 0.00          | 0.00          |
| TC013810                                                                | larval cuticle protein 1 [Tribolium castaneum]                             | -14.23           | -14.23            | 19.16   | 0.00          | 0.00          |
| TC003056                                                                | cuticle protein 70, isoforms A and B                                       | -14.21           | -4.55             | 19.01   | 0.00          | 0.81          |
| TC013816                                                                | Adult-specific cuticular protein ACP-20-like Protein                       | -12.75           | -12.75            | 6.90    | 0.00          | 0.00          |
| TC002841                                                                | Pupal cuticle protein C1B                                                  | -9.95            | -9.32             | 1379.45 | 1.39          | 2.16          |
| TC007402                                                                | larval cuticle protein F1 [Tribolium castaneum]                            | -9.05            | -18.33            | 328.47  | 0.62          | 0.00          |
| TC000724                                                                | Larval cuticle protein A3A-like Protein                                    | -8.79            | -7.10             | 5831.66 | 13.21         | 42.55         |
| TC003835                                                                | Pupal cuticle protein Edg-78E-like Protein                                 | -8.73            | -7.93             | 437.17  | 1.03          | 1.79          |
| TC015549                                                                | glycine-rich cell wall structural protein isoform X2 [Tribolium castaneum] | -8.67            | -6.45             | 253.86  | 0.63          | 2.90          |
| TC001875                                                                | putative glycine-rich cell wall structural protein 1 [Tribolium castaneum] | -8.55            | -8.34             | 294.37  | 0.78          | 0.91          |
| TC008769                                                                | larval cuticle protein A3A-like [Nicrophorus vespilloides]                 | -8.34            | -6.22             | 443.87  | 1.37          | 5.95          |
| TC000722                                                                | Pupal cuticle protein Edg-84A-like Protein                                 | -8.31            | -7.43             | 2322.44 | 7.33          | 13.47         |
| TC003830                                                                | pupal cuticle protein 20                                                   | -8.25            | -5.23             | 83.57   | 0.27          | 2.23          |
| TC006262                                                                | Pupal cuticle protein C1B-like Protein                                     | -8.18            | -18.43            | 352.66  | 1.21          | 0.00          |
| TC000723                                                                | Pupal cuticle protein Edg-84A-like Protein                                 | -8.18            | -7.08             | 5580.47 | 19.21         | 41.18         |
| TC011925                                                                | cuticle protein 16.5, isoform A                                            | -8.15            | -7.48             | 4830.31 | 16.98         | 26.98         |
| TC003384                                                                | cuticle protein 16.5, isoform B                                            | -7.70            | -7.33             | 1907.69 | 9.16          | 11.82         |
| TC000725                                                                | Pupal cuticle protein Edg-84A-like Protein                                 | -7.54            | -6.51             | 5759.76 | 31.00         | 63.39         |
| TC003385                                                                | cuticle protein 16.5, isoform B                                            | -7.14            | -5.11             | 303.14  | 2.16          | 8.76          |
| TC003832                                                                | Endocuticle structural glycoprotein SgAbd-2-like Protein                   | -6.62            | -6.05             | 1155.77 | 11.71         | 17.49         |
| TC013826                                                                | Pupal cuticle protein Edg-84A-like Protein [Tribolium castaneum]           | -6.33            | -5.12             | 32.98   | 0.41          | 0.95          |
| TC007306                                                                | cuticle protein 64 [Tribolium castaneum]                                   | -5.80            | -2.97             | 874.51  | 15.68         | 111.49        |
| TC003831                                                                | pupal cuticle protein 20 [Tribolium castaneum]                             | -5.69            | -5.15             | 56.74   | 1.10          | 1.60          |
| TC002669                                                                | Cuticlin-1 [Habropoda laboriosa]                                           | -5.66            | -4.63             | 31.51   | 0.63          | 1.27          |
| TC000163                                                                | Cuticlin-1 [Cyphomyrmex costatus]                                          | -5.49            | -6.95             | 188.51  | 4.20          | 1.52          |
| TC006646                                                                | cuticle protein 18.7-like                                                  | -5.37            | -5.15             | 15.12   | 0.37          | 0.43          |
| TC003363                                                                | Pro-resilin-like Protein                                                   | -5.26            | -3.83             | 50.55   | 1.31          | 3.56          |
| TC000639                                                                | pro-resilin                                                                | -5.26            | -5.53             | 157.28  | 4.11          | 3.41          |
| TC004546                                                                | Cuticle protein 3-like Protein                                             | -4.78            | -3.83             | 2314.44 | 84.13         | 162.82        |

|          |                                                                    |        |        |         |         |         |
|----------|--------------------------------------------------------------------|--------|--------|---------|---------|---------|
| TC000719 | Larval cuticle protein A1A-like Protein                            | -4.71  | -4.75  | 555.89  | 21.20   | 20.68   |
| TC000721 | Pupal cuticle protein Edg-84A-like Protein                         | -4.66  | -13.80 | 14.23   | 0.56    | 0.00    |
| TC003376 | cuticle protein 65 [Tribolium castaneum]                           | -4.20  | -3.99  | 50.17   | 2.72    | 3.16    |
| TC010054 | cuticle protein 21-like [Aethina tumida]                           | -3.87  | -2.40  | 1657.05 | 113.07  | 314.97  |
| TC008770 | Pupal cuticle protein Edg-84A-like Protein                         | -3.85  | -4.96  | 52.49   | 3.64    | 1.69    |
| TC000980 | Cuticular protein hypothetical 33 precursor [Bombyx mori]          | -3.79  | -3.57  | 27.10   | 1.96    | 2.28    |
| TC001440 | Cuticlin-1 [Trachymyrmex zeteki]                                   | -3.61  | -3.91  | 18.24   | 1.50    | 1.22    |
| TC007275 | glycine-rich cell wall structural protein 1.8-like [Aedes aegypti] | -3.48  | -3.40  | 47.15   | 4.23    | 4.47    |
| TC014497 | Larval cuticle protein 8-like Protein                              | -3.35  | -2.48  | 443.89  | 43.66   | 79.53   |
| TC004547 | Endocuticle structural glycoprotein SgAbd-2-like Protein           | -3.06  | -2.18  | 34.81   | 4.16    | 7.66    |
| TC014104 | Cuticlin-1-like Protein                                            | -2.69  | -4.32  | 124.79  | 19.40   | 6.26    |
| TC013134 | Larval cuticle protein LCP-30-like Protein                         | -2.63  | -1.07  | 43.53   | 7.05    | 20.70   |
| TC006981 | proline-rich extensin-like protein EPR1                            | -2.55  | -1.30  | 111.31  | 19.07   | 45.32   |
| TC004548 | endocuticle structural glycoprotein SgAbd-1                        | -2.50  | -2.11  | 122.76  | 21.74   | 28.47   |
| TC003770 | Cuticlin-1 [Atta colombica]                                        | -2.23  | -2.86  | 13.47   | 2.87    | 1.85    |
| TC013137 | Pupal cuticle protein-like Protein                                 | -2.12  | -1.04  | 704.87  | 161.71  | 342.89  |
| TC003060 | cuticle protein 19.8                                               | -2.06  | -1.46  | 699.99  | 167.64  | 254.23  |
| TC009263 | cuticular protein analogous to peritrophins 1-D precursor          | -1.84  | -1.74  | 56.63   | 15.81   | 16.94   |
| TC013812 | Pupal cuticle protein Edg-84A-like Protein                         | -1.73  | -1.63  | 23.24   | 7.01    | 7.51    |
| TC015720 | larval cuticle protein A3A [Ceratitis capitata]                    | -1.69  | -3.81  | 156.76  | 48.68   | 11.16   |
| TC011140 | cuticular protein analogous to peritrophins 3-A1 precursor         | -1.55  | -3.32  | 290.15  | 99.30   | 29.05   |
| TC004733 | cuticular protein analogous to peritrophins 1-A                    | -1.38  | -1.06  | 78.06   | 30.07   | 37.51   |
| TC003048 | cuticle protein 19.8                                               | -1.30  | -1.30  | 5351.21 | 2168.35 | 2175.96 |
| TC002343 | glycine-rich protein DOT1                                          | -12.42 | -12.42 | 5.47    | 0.00    | 0.00    |
| TC008858 | Agrin-like Protein                                                 | -4.44  | -5.32  | 58.90   | 2.72    | 1.47    |
| TC014761 | cell wall protein RBR3 isoform X2 [Drosophila takahashii]          | -3.08  | -2.02  | 201.45  | 23.87   | 49.64   |
| TC007273 | elastin                                                            | -2.03  | -1.83  | 62.87   | 15.44   | 17.63   |
| TC007080 | cell wall protein RBR3 [Bombus terrestris]                         | -4.49  | -4.64  | 28.24   | 1.25    | 1.13    |
| TC012301 | Protein Skeletor, isoforms B/C-like Protein                        | -2.41  | -3.55  | 27.71   | 5.22    | 2.37    |
| TC012207 | <b>prisilkin-39</b>                                                | -1.47  | -7.89  | 3251.35 | 1170.12 | 13.72   |
| TC011659 | keratin, type I cytoskeletal 10-like [Monomorium pharaonis]        | -18.75 | -18.75 | 441.77  | 0.00    | 0.00    |
| TC011660 | keratin, type II cytoskeletal 1-like [Anoplophora glabripennis]    | -12.51 | -12.51 | 5.85    | 0.00    | 0.00    |
| TC015460 | keratin, type I cytoskeletal 9                                     | -6.80  | -5.69  | 419.34  | 3.77    | 8.13    |
| TC015245 | mucin-12-like [Monomorium pharaonis]                               | -5.66  | -6.84  | 776.72  | 15.33   | 6.80    |
| TC011888 | mucin-5AC [Bactrocera oleae]                                       | -5.63  | -4.80  | 602.36  | 12.16   | 21.65   |
| TC011601 | mucin-3A isoform X2 [Anoplophora glabripennis]                     | -4.37  | -3.98  | 65.48   | 3.17    | 4.14    |
| TC009861 | mucin-5AC isoform X1 [Tribolium castaneum]                         | -4.28  | -5.06  | 46.64   | 2.40    | 1.40    |

|                                            |                                                                                  |       |       |        |       |        |
|--------------------------------------------|----------------------------------------------------------------------------------|-------|-------|--------|-------|--------|
| TC007806                                   | mucin-5AC-like [Nilaparvata lugens]                                              | -3.87 | -4.31 | 120.72 | 8.23  | 6.08   |
| <b>Cuticle metabolism</b>                  |                                                                                  |       |       |        |       |        |
| TC001770                                   | putative chitinase 3-like Protein                                                | -7.76 | -9.75 | 856.64 | 3.95  | 1.00   |
| TC011222                                   | Chorion peroxidase-like Protein                                                  | -2.41 | -2.04 | 14.54  | 2.74  | 3.53   |
| TC015234                                   | Chorion peroxidase-like Protein                                                  | -5.08 | -4.91 | 97.69  | 2.89  | 3.26   |
| TC012734                                   | putative chitinase 3-like Protein (Chitinase 10)                                 | -3.20 | -5.75 | 258.05 | 28.02 | 4.78   |
| TC005652                                   | putative chitinase 3 [Papilio machaon]                                           | -4.76 | -3.47 | 129.72 | 4.78  | 11.67  |
| TC010675                                   | truncated knickkopf 3                                                            | -4.00 | -3.04 | 179.21 | 11.18 | 21.79  |
| TC009636                                   | Alpha-N-acetylgalactosaminidase-like Protein                                     | -1.17 | -3.14 | 41.16  | 18.27 | 4.68   |
| TC002496                                   | Tyrosine 3-monooxygenase-like Protein                                            | -2.29 | -1.58 | 435.21 | 89.11 | 145.95 |
| <b>Cyp450 including hormone metabolism</b> |                                                                                  |       |       |        |       |        |
| TC015295                                   | cytochrome P450 4C1                                                              | -3.47 | -2.11 | 6.22   | 0.56  | 1.44   |
| TC004159                                   | <b>cytochrome P450 307A1 (spook)</b>                                             | -3.37 | -4.15 | 14.10  | 1.37  | 0.79   |
| TC015992                                   | cytochrome P450-like protein                                                     | -2.67 | -2.68 | 24.61  | 3.86  | 3.84   |
| TC008302                                   | cytochrome P450 301A1                                                            | -2.46 | -2.17 | 16.42  | 2.98  | 3.66   |
| TC010255                                   | cytochrome P450 6BK2                                                             | -2.23 | -3.18 | 7.53   | 1.61  | 0.83   |
| TC002722                                   | cytochrome P450-like protein                                                     | -1.84 | -2.04 | 42.94  | 12.01 | 10.46  |
| <b>Hormonal signaling pathways</b>         |                                                                                  |       |       |        |       |        |
| TC004812                                   | Ecdysone-induced protein 74EF isoform A isoform X1                               | -3.11 | -3.90 | 39.85  | 4.61  | 2.68   |
| TC004816                                   | Ecdysone-induced protein 74EF isoform B-like Protein                             | -1.81 | -2.20 | 126.69 | 36.18 | 27.66  |
| TC003935                                   | E78 nuclear receptor                                                             | -3.17 | -3.96 | 17.92  | 1.99  | 1.15   |
| TC008909                                   | <b>hormone receptor in 46-like protein (DHR3)</b>                                | -3.61 | -4.56 | 132.56 | 10.89 | 5.62   |
| TC000543                                   | HR4                                                                              | -3.90 | -4.60 | 30.47  | 2.05  | 1.26   |
| TC015109                                   | Ecdysone-inducible gene E3 [Drosophila melanogaster]                             | -2.55 | -2.87 | 219.68 | 37.59 | 30.09  |
| TC002550                                   | ftz transcription factor 1                                                       | -2.11 | -1.77 | 104.99 | 24.26 | 30.70  |
| TC011655                                   | Neuropeptide F receptor-like Protein                                             | -3.35 | -2.31 | 13.58  | 1.33  | 2.75   |
| TC008163                                   | Ricket, Leucine-rich repeat-containing G-protein coupled receptor 5-like Protein | -2.32 | -2.47 | 21.59  | 4.31  | 3.91   |
| TC001181                                   | <b>CG13579-like amine receptor [Tribolium castaneum]</b>                         | -3.21 | -3.36 | 94.76  | 10.22 | 9.23   |
| <b>Sensory molecular components</b>        |                                                                                  |       |       |        |       |        |
| TC013139                                   | Gustatory receptor for sugar taste 64e-like Protein                              | -7.11 | -5.44 | 275.40 | 1.99  | 6.36   |
| TC003050                                   | Odorant receptor 46a, isoform A-like Protein                                     | -5.88 | -8.47 | 454.28 | 7.73  | 1.28   |
| TC008677                                   | chemosensory protein 5                                                           | -5.32 | -5.69 | 86.57  | 2.16  | 1.68   |
| TC008680                                   | chemosensory protein 9                                                           | -5.03 | -4.93 | 863.59 | 26.48 | 28.26  |
| TC008676                                   | chemosensory protein 4                                                           | -4.75 | -4.54 | 79.02  | 2.93  | 3.40   |
| TC008678                                   | chemosensory protein 2                                                           | -2.95 | -3.74 | 44.64  | 5.77  | 3.35   |
| <b>Others</b>                              |                                                                                  |       |       |        |       |        |
| TC006510                                   | cGMP-dependent protein kinase, isozyme 2 forms cD4/T1/T3A/T3B-like Protein       | -1.91 | -2.28 | 33.68  | 8.98  | 6.95   |

|          |                                                                                        |        |        |         |      |      |
|----------|----------------------------------------------------------------------------------------|--------|--------|---------|------|------|
| TC006392 | cys-loop ligand-gated ion channel subunit                                              | -3.03  | -1.47  | 14.68   | 1.79 | 5.30 |
| TC015583 | Alpha-tocopherol transfer protein-like                                                 | -3.15  | -2.56  | 52.81   | 5.93 | 8.95 |
| TC005432 | cathepsin B precursor                                                                  | -4.08  | -4.86  | 38.53   | 2.28 | 1.33 |
| TC005234 | pollen-specific leucine-rich repeat extensin-like protein 2 [Anoplophora glabripennis] | -18.59 | -9.02  | 395.09  | 0.00 | 0.76 |
| TC010790 | —                                                                                      | -16.17 | -5.47  | 73.81   | 0.00 | 1.66 |
| TC008657 | serine protease P84                                                                    | -16.04 | -16.04 | 67.20   | 0.00 | 0.00 |
| TC014645 | neuropeptide-like protein 31 isoform X1 [Tribolium castaneum]                          | -15.94 | -5.50  | 63.08   | 0.00 | 1.40 |
| TC005904 | carboxypeptidase A                                                                     | -15.94 | -6.93  | 62.65   | 0.00 | 0.51 |
| TC015712 | Glucose dehydrogenase [FAD, quinone]-like Protein                                      | -15.19 | -6.19  | 37.38   | 0.00 | 0.51 |
| TC001417 | Lipase member H-A-like Protein                                                         | -14.73 | -14.73 | 27.24   | 0.00 | 0.00 |
| TC015789 | —                                                                                      | -14.52 | -14.52 | 23.49   | 0.00 | 0.00 |
| TC000428 | —                                                                                      | -14.42 | -4.50  | 21.86   | 0.00 | 0.97 |
| TC010803 | serine/threonine-protein kinase pakD-like [Polistes dominula]                          | -14.35 | -14.35 | 20.92   | 0.00 | 0.00 |
| TC015395 | Acyl-CoA desaturase-like Protein                                                       | -14.17 | -14.17 | 18.48   | 0.00 | 0.00 |
| TC015791 | —                                                                                      | -14.11 | -14.11 | 17.72   | 0.00 | 0.00 |
| TC015790 | —                                                                                      | -14.06 | -14.06 | 17.04   | 0.00 | 0.00 |
| TC015794 | nicotinate phosphoribosyltransferase [Oceanobacillus]                                  | -13.94 | -13.94 | 15.68   | 0.00 | 0.00 |
| TC009465 | —                                                                                      | -13.81 | -1.76  | 14.37   | 0.00 | 4.24 |
| TC006563 | —                                                                                      | -13.79 | -13.79 | 14.19   | 0.00 | 0.00 |
| TC012151 | —                                                                                      | -13.78 | -13.78 | 14.10   | 0.00 | 0.00 |
| TC010191 | sodium/potassium/calcium exchanger 1-like [Anoplophora glabripennis]                   | -13.61 | -13.61 | 12.51   | 0.00 | 0.00 |
| TC009479 | —                                                                                      | -13.52 | -13.52 | 11.75   | 0.00 | 0.00 |
| TC012150 | Lipase member H-A-like Protein                                                         | -13.41 | -3.66  | 10.91   | 0.00 | 0.86 |
| TC011665 | putative lysozyme-like protein [Dendroctonus ponderosae]                               | -13.20 | -13.20 | 9.38    | 0.00 | 0.00 |
| TC010841 | —                                                                                      | -13.19 | -4.50  | 9.36    | 0.00 | 0.41 |
| TC003707 | zinc finger protein 396                                                                | -13.04 | -3.69  | 8.43    | 0.00 | 0.65 |
| TC007272 | protein TonB-like                                                                      | -12.82 | -12.82 | 7.22    | 0.00 | 0.00 |
| TC008554 | Serine proteinase stubble [Papilio machaon]                                            | -12.77 | -12.77 | 7.00    | 0.00 | 0.00 |
| TC008104 | —                                                                                      | -12.73 | -12.73 | 6.78    | 0.00 | 0.00 |
| TC009862 | —                                                                                      | -11.96 | -11.96 | 3.98    | 0.00 | 0.00 |
| TC001121 | tyrosine-protein phosphatase non-receptor type 23-like [Aethina tumida]                | -11.80 | -3.55  | 3.57    | 0.00 | 0.30 |
| TC012620 | —                                                                                      | -10.29 | -9.07  | 748.86  | 0.60 | 1.39 |
| TC005225 | Zinc metalloprotease zmpB [Apis cerana cerana]                                         | -10.24 | -12.02 | 2413.34 | 2.00 | 0.58 |
| TC015556 | splicing factor 3A subunit 2                                                           | -9.50  | -8.28  | 265.95  | 0.37 | 0.85 |
| TC010813 | Apolipoprotein D-like Protein                                                          | -9.47  | -18.10 | 281.09  | 0.40 | 0.00 |
| TC014264 | —                                                                                      | -8.56  | -17.64 | 204.05  | 0.54 | 0.00 |
| TC010840 | nuclear polyadenylated RNA-binding protein 3 [Tribolium castaneum]                     | -8.34  | -6.12  | 50.48   | 0.16 | 0.72 |

|             |                                                                                                      |       |        |         |       |       |
|-------------|------------------------------------------------------------------------------------------------------|-------|--------|---------|-------|-------|
| TC012760    | Facilitated trehalose transporter Tret1-2 homolog-like Protein                                       | -8.14 | -6.92  | 50.42   | 0.18  | 0.42  |
| TC003057    | neuropeptide-like precursor 3                                                                        | -8.05 | -7.33  | 7596.91 | 28.67 | 47.10 |
| TC011237    | —                                                                                                    | -8.03 | -6.08  | 1138.37 | 4.36  | 16.88 |
| TC030071-GA | —                                                                                                    | -8.02 | -6.80  | 56.17   | 0.22  | 0.50  |
| TC005613    | surface protein isoform X1                                                                           | -7.60 | -6.39  | 111.74  | 0.57  | 1.33  |
| TC008369    | —                                                                                                    | -7.48 | -7.85  | 448.82  | 2.51  | 1.95  |
| TC012679    | serine, glycine and glutamine-rich protein-like [Anoplophora glabripennis]                           | -7.40 | -9.50  | 299.28  | 1.78  | 0.41  |
| TC005503    | Vitellogenin-2-like Protein                                                                          | -7.39 | -7.76  | 138.66  | 0.83  | 0.64  |
| TC006612    | Signal recognition particle subunit SRP68-like Protein                                               | -7.20 | -5.40  | 29.38   | 0.20  | 0.70  |
| TC005905    | carboxypeptidase A                                                                                   | -7.03 | -7.49  | 674.38  | 5.17  | 3.75  |
| TC010421    | RNA polymerase II degradation factor 1                                                               | -6.98 | -9.70  | 962.02  | 7.62  | 1.15  |
| TC009528    | —                                                                                                    | -6.89 | -6.99  | 28.49   | 0.24  | 0.22  |
| TC000548    | serine protease-like protein                                                                         | -6.88 | -15.15 | 36.44   | 0.31  | 0.00  |
| TC006093    | stress response protein [Lasius niger]                                                               | -6.87 | -6.43  | 258.70  | 2.21  | 2.99  |
| TC011658    | —                                                                                                    | -6.63 | -6.42  | 32.87   | 0.33  | 0.38  |
| TC010196    | filaggrin-2-like isoform X10 [Priapulus caudatus]                                                    | -6.59 | -7.96  | 59.45   | 0.62  | 0.24  |
| TC015593    | alpha/beta hydrolase [Myxococcus virescens]                                                          | -6.56 | -6.93  | 252.64  | 2.68  | 2.08  |
| TC008235    | altered inheritance of mitochondria protein 3                                                        | -6.51 | -4.71  | 25.25   | 0.28  | 0.97  |
| TC008659    | serine proteinase stubble [Tribolium castaneum]                                                      | -6.48 | -7.27  | 50.12   | 0.56  | 0.32  |
| TC005614    | surface protein isoform X1                                                                           | -6.38 | -6.75  | 83.09   | 1.00  | 0.77  |
| TC009889    | high mobility group nucleosome-binding domain-containing protein 5 isoform X1 [Bactrocera latifrons] | -6.36 | -6.14  | 52.37   | 0.64  | 0.74  |
| TC010419    | C-type lectin precursor                                                                              | -6.22 | -5.89  | 375.07  | 5.04  | 6.34  |
| TC002385    | —                                                                                                    | -6.14 | -5.92  | 42.38   | 0.60  | 0.70  |
| TC016312    | myb-like protein Q isoform X1 [Bactrocera dorsalis]                                                  | -6.03 | -15.90 | 61.31   | 0.94  | 0.00  |
| TC008392    | —                                                                                                    | -5.87 | -6.24  | 26.59   | 0.45  | 0.35  |
| TC001023    | serine protease P22                                                                                  | -5.86 | -3.32  | 16.38   | 0.28  | 1.64  |
| TC016368    | invected                                                                                             | -5.66 | -6.44  | 157.39  | 3.11  | 1.81  |
| TC006985    | alpha-protein kinase 1 isoform X1                                                                    | -5.63 | -4.16  | 109.23  | 2.21  | 6.10  |
| TC015724    | glucose dehydrogenase [FAD, quinone]                                                                 | -5.61 | -4.50  | 50.48   | 1.03  | 2.23  |
| TC012680    | serine, glycine and glutamine-rich protein-like [Anoplophora glabripennis]                           | -5.53 | -7.31  | 64.83   | 1.40  | 0.41  |
| TC013560    | juvenile hormone binding protein-like precursor [Aphis gossypii]                                     | -5.50 | -5.06  | 160.14  | 3.55  | 4.80  |
| TC006726    | spatzle 4                                                                                            | -5.49 | -5.28  | 12.31   | 0.27  | 0.32  |
| TC015195    | Protein takeout-like Protein                                                                         | -5.27 | -5.47  | 56.46   | 1.46  | 1.27  |
| TC010192    | tetra-peptide repeat homeobox protein 1-like [Nicrophorus vespilloides]                              | -5.17 | -6.54  | 94.03   | 2.60  | 1.01  |
| TC004622    | serine protease H51                                                                                  | -5.14 | -4.72  | 57.89   | 1.64  | 2.19  |
| TC012819    | putative fatty acyl-CoA reductase CG5065                                                             | -5.12 | -5.65  | 27.64   | 0.79  | 0.55  |
| TC006122    | —                                                                                                    | -5.10 | -16.35 | 83.27   | 2.42  | 0.00  |

|          |                                                                                                         |       |        |        |       |       |
|----------|---------------------------------------------------------------------------------------------------------|-------|--------|--------|-------|-------|
| TC003763 | ——                                                                                                      | -5.04 | -5.03  | 65.54  | 2.00  | 2.01  |
| TC014638 | ——                                                                                                      | -5.02 | -6.12  | 125.03 | 3.87  | 1.80  |
| TC012826 | ——                                                                                                      | -4.81 | -5.28  | 161.04 | 5.73  | 4.16  |
| TC016313 | RNA polymerase II degradation factor 1 isoform X1 [Aedes aegypti]                                       | -4.72 | -5.85  | 574.69 | 21.73 | 9.98  |
| TC002085 | serpin peptidase inhibitor 2                                                                            | -4.72 | -4.50  | 36.89  | 1.40  | 1.63  |
| TC010842 | Replicase polyprotein 1a [Dufourea novaeangliae]                                                        | -4.71 | -13.30 | 10.10  | 0.38  | 0.00  |
| TC005375 | Larval serum protein 2-like Protein                                                                     | -4.69 | -3.80  | 90.91  | 3.52  | 6.52  |
| TC008844 | 1a-related protein 6                                                                                    | -4.59 | -4.71  | 658.54 | 27.26 | 25.14 |
| TC007264 | lipase 3-like                                                                                           | -4.59 | -5.96  | 17.75  | 0.74  | 0.29  |
| TC006658 | alkaline phosphatase                                                                                    | -4.40 | -4.18  | 36.46  | 1.73  | 2.01  |
| TC014301 | leucine-rich repeat and fibronectin type-III domain-containing protein 5                                | -4.39 | -3.85  | 54.39  | 2.59  | 3.76  |
| TC012827 | phosphatidylinositol phosphatase PTPRQ-like [Tropilaelaps mercedesae]                                   | -4.26 | -5.05  | 364.29 | 18.95 | 11.00 |
| TC002293 | pipe                                                                                                    | -4.24 | -4.89  | 57.35  | 3.04  | 1.93  |
| TC002945 | titin isoform X1 [Tribolium castaneum]                                                                  | -4.23 | -3.99  | 86.46  | 4.60  | 5.43  |
| TC007763 | zinc finger protein 512B [Tribolium castaneum]                                                          | -4.19 | -3.03  | 125.86 | 6.91  | 15.39 |
| TC015158 | Dehydrogenase/reductase SDR family protein 7-like                                                       | -4.06 | -3.95  | 74.00  | 4.44  | 4.78  |
| TC015721 | Glucose dehydrogenase [FAD, quinone]-like Protein                                                       | -4.02 | -5.15  | 78.59  | 4.84  | 2.22  |
| TC014619 | ——                                                                                                      | -4.02 | -1.80  | 52.91  | 3.27  | 15.20 |
| TC006564 | ——                                                                                                      | -3.94 | -4.57  | 20.30  | 1.33  | 0.86  |
| TC001783 | RNA polymerase II degradation factor 1 [Bombus impatiens]                                               | -3.92 | -4.51  | 102.70 | 6.79  | 4.50  |
| TC007252 | MD-2-related lipid-recognition protein-like Protein                                                     | -3.86 | -3.65  | 16.85  | 1.16  | 1.35  |
| TC014741 | Blimp-1                                                                                                 | -3.82 | -4.13  | 63.66  | 4.51  | 3.64  |
| TC013505 | ——                                                                                                      | -3.77 | -5.14  | 94.29  | 6.91  | 2.67  |
| TC015554 | Dehydrogenase/reductase SDR family protein 7-like                                                       | -3.76 | -3.89  | 344.90 | 25.41 | 23.27 |
| TC011602 | ——                                                                                                      | -3.76 | -4.13  | 188.09 | 13.91 | 10.77 |
| TC011657 | ——                                                                                                      | -3.75 | -3.53  | 11.54  | 0.86  | 1.00  |
| TC012466 | seminal fluid protein [Leptinotarsa decemlineata]                                                       | -3.68 | -4.29  | 171.78 | 13.37 | 8.81  |
| TC002984 | sushi, von Willebrand factor type A, EGF and pentraxin domain-containing protein 1 [Acyrtosiphon pisum] | -3.67 | -3.38  | 24.44  | 1.92  | 2.35  |
| TC001977 | Xanthine dehydrogenase-like Protein                                                                     | -3.61 | -4.66  | 21.27  | 1.74  | 0.84  |
| TC006224 | ——                                                                                                      | -3.56 | -5.11  | 229.19 | 19.46 | 6.61  |
| TC011736 | WW domain-containing oxidoreductase-like Protein                                                        | -3.42 | -4.62  | 48.96  | 4.57  | 1.99  |
| TC007085 | ——                                                                                                      | -3.41 | -2.34  | 206.46 | 19.38 | 40.91 |
| TC014646 | T-complex-associated testis-expressed protein 1-like Protein                                            | -3.37 | -4.15  | 3.78   | 0.37  | 0.21  |
| TC009212 | EGF-like domain-containing protein 2 [Tribolium castaneum]                                              | -3.28 | -2.61  | 56.97  | 5.86  | 9.31  |
| TC005065 | serpin peptidase inhibitor 6                                                                            | -3.27 | -3.79  | 23.25  | 2.41  | 1.68  |
| TC013617 | heat shock protein DDB_G0288861                                                                         | -3.26 | -2.73  | 5.23   | 0.54  | 0.79  |
| TC002341 | Dorsal-ventral patterning protein tolloid-like Protein                                                  | -3.20 | -6.38  | 58.78  | 6.39  | 0.71  |

|          |                                                                   |       |        |         |         |        |
|----------|-------------------------------------------------------------------|-------|--------|---------|---------|--------|
| TC012467 | Sulfotransferase family cytosolic 1B member 1-like Protein        | -3.10 | -1.47  | 14.67   | 1.71    | 5.29   |
| TC015830 | Putative phosphatidate phosphatase-like Protein                   | -3.04 | -4.15  | 14.59   | 1.77    | 0.82   |
| TC007042 | Vitellogenin-3-like Protein                                       | -3.03 | -3.13  | 20.20   | 2.48    | 2.30   |
| TC010879 | WW domain-containing oxidoreductase-like Protein                  | -3.02 | -2.81  | 7.20    | 0.89    | 1.03   |
| TC013657 | circadian clock-controlled protein-like [Megachile rotundata]     | -3.00 | -1.63  | 2216.49 | 277.77  | 715.02 |
| TC013416 | tripartite motif-containing protein 45                            | -2.97 | -1.46  | 22.45   | 2.86    | 8.16   |
| TC005627 | ankycorbin isoform X1                                             | -2.96 | -3.99  | 14.56   | 1.87    | 0.92   |
| TC013283 | NADPH oxidase 5 isoform X1 [Tribolium castaneum]                  | -2.93 | -2.50  | 34.70   | 4.54    | 6.14   |
| TC013787 | Zinc finger protein 570-like Protein                              | -2.89 | -2.34  | 18.96   | 2.55    | 3.75   |
| TC006664 | pollen-specific leucine-rich repeat extensin-like protein 1       | -2.89 | -4.67  | 8439.91 | 1140.25 | 331.27 |
| TC004654 | serine protease P54                                               | -2.84 | -3.08  | 21.61   | 3.01    | 2.56   |
| TC008120 | —                                                                 | -2.83 | -2.94  | 19.54   | 2.74    | 2.55   |
| TC015337 | Fatty acid synthase-like Protein                                  | -2.79 | -4.13  | 68.68   | 9.94    | 3.93   |
| TC013042 | serine protease P133                                              | -2.79 | -2.22  | 16.25   | 2.35    | 3.48   |
| TC008236 | probable basic-leucine zipper transcription factor I              | -2.76 | -3.86  | 10.41   | 1.54    | 0.72   |
| TC009126 | heat shock protein 68b                                            | -2.67 | -2.46  | 4.52    | 0.71    | 0.82   |
| TC005192 | DNA replication licensing factor Mcm2-like Protein                | -2.66 | -4.45  | 10.59   | 1.67    | 0.49   |
| TC013568 | Protein scarlet-like Protein                                      | -2.64 | -1.95  | 28.69   | 4.60    | 7.43   |
| TC004635 | serine protease P53                                               | -2.62 | -4.94  | 563.36  | 91.42   | 18.33  |
| TC000393 | Synaptic vesicle glycoprotein 2B-like Protein                     | -2.56 | -2.65  | 165.85  | 28.08   | 26.49  |
| TC013659 | Protein takeout-like Protein                                      | -2.56 | -2.23  | 614.26  | 104.08  | 131.21 |
| TC011656 | osiris 24-like protein [Lasius niger]                             | -2.56 | -2.34  | 36.08   | 6.12    | 7.11   |
| TC009318 | Protein Wnt-5-like Protein                                        | -2.55 | -12.49 | 5.74    | 0.98    | 0.00   |
| TC004557 | aminopeptidase N-like protein                                     | -2.55 | -3.16  | 297.25  | 50.88   | 33.18  |
| TC000547 | serine protease P13                                               | -2.54 | -4.50  | 180.17  | 31.03   | 7.97   |
| TC004298 | —                                                                 | -2.53 | -4.12  | 41.73   | 7.25    | 2.40   |
| TC009716 | —                                                                 | -2.52 | -2.05  | 25.09   | 4.36    | 6.08   |
| TC003708 | C-type lectin precursor                                           | -2.48 | -2.26  | 572.73  | 102.73  | 119.30 |
| TC016319 | SGNH/GDSL hydrolase family protein                                | -2.47 | -4.07  | 54.01   | 9.72    | 3.22   |
| TC003194 | scabrous                                                          | -2.43 | -2.80  | 15.52   | 2.89    | 2.23   |
| TC015490 | putative eukaryotic translation initiation factor 3 theta subunit | -2.39 | -1.06  | 43.07   | 8.20    | 20.64  |
| TC009833 | Putative fatty acyl-CoA reductase CG5065-like Protein             | -2.39 | -3.67  | 223.66  | 42.70   | 17.60  |
| TC008206 | myrosinase-binding protein 2                                      | -2.37 | -3.15  | 12.77   | 2.48    | 1.44   |
| TC008910 | —                                                                 | -2.37 | -2.69  | 56.88   | 11.03   | 8.83   |
| TC006120 | Putative fatty acyl-CoA reductase CG5065-like Protein             | -2.35 | -2.97  | 94.99   | 18.66   | 12.13  |
| TC014184 | rhoGEF domain-containing protein gxcl isoform X1                  | -2.34 | -4.36  | 1026.46 | 202.07  | 50.06  |
| TC002943 | Zinc transporter ZIP1-like Protein                                | -2.34 | -1.70  | 49.53   | 9.76    | 15.20  |

|          |                                                                                                 |       |       |         |        |        |
|----------|-------------------------------------------------------------------------------------------------|-------|-------|---------|--------|--------|
| TC015589 | —                                                                                               | -2.30 | -2.67 | 27.36   | 5.54   | 4.29   |
| TC005793 | Dehydrogenase/reductase SDR family protein 7-like                                               | -2.30 | -3.08 | 11.00   | 2.23   | 1.30   |
| TC011214 | Putative fatty acyl-CoA reductase CG5065-like Protein                                           | -2.30 | -1.86 | 64.55   | 13.14  | 17.84  |
| TC010771 | putative E3 ubiquitin-protein ligase sinah                                                      | -2.28 | -2.28 | 20.19   | 4.16   | 4.17   |
| TC012794 | —                                                                                               | -2.27 | -3.32 | 24.50   | 5.07   | 2.45   |
| TC003396 | —                                                                                               | -2.23 | -3.82 | 7.01    | 1.49   | 0.50   |
| TC015399 | Fatty acid synthase-like Protein                                                                | -2.22 | -5.84 | 73.15   | 15.66  | 1.28   |
| TC009368 | Rhophilin-2-like Protein                                                                        | -2.20 | -1.33 | 22.12   | 4.83   | 8.81   |
| TC007331 | GILT-like protein F37H8.5                                                                       | -2.18 | -2.38 | 77.82   | 17.20  | 14.98  |
| TC012390 | serine protease H129                                                                            | -2.17 | -2.40 | 55.12   | 12.29  | 10.45  |
| TC008455 | putative mediator of RNA polymerase II transcription subunit 26                                 | -2.16 | -2.31 | 9.98    | 2.23   | 2.01   |
| TC011335 | —                                                                                               | -2.15 | -1.14 | 12.32   | 2.77   | 5.60   |
| TC010098 | —                                                                                               | -2.15 | -1.54 | 22.34   | 5.03   | 7.69   |
| TC011379 | tartan/capricious-like protein                                                                  | -2.14 | -1.55 | 114.95  | 26.15  | 39.21  |
| TC013059 | Putative ferric-chelate reductase 1 homolog-like Protein                                        | -2.13 | -1.39 | 1108.95 | 253.36 | 422.80 |
| TC010154 | skin secretory protein xP2                                                                      | -2.12 | -2.08 | 152.64  | 35.12  | 36.10  |
| TC015723 | Glucose dehydrogenase                                                                           | -2.11 | -2.96 | 168.10  | 38.91  | 21.58  |
| TC006428 | Monocarboxylate transporter 7-like Protein                                                      | -2.10 | -2.52 | 10.65   | 2.48   | 1.86   |
| TC002263 | —                                                                                               | -2.09 | -1.43 | 54.02   | 12.67  | 20.07  |
| TC003987 | SEC14 domain and spectrin repeat-containing protein 1-like ProteinSEC14????????????????????1??? | -2.09 | -2.18 | 56.22   | 13.24  | 12.37  |
| TC000611 | Alpha-tocopherol transfer protein-like                                                          | -2.05 | -2.14 | 27.26   | 6.57   | 6.17   |
| TC008809 | integrase core domain-containing protein                                                        | -2.05 | -2.65 | 5.57    | 1.34   | 0.89   |
| TC016278 | Elongation of very long chain fatty acids protein AAEL008004-like Protein                       | -2.05 | -2.68 | 38.28   | 9.26   | 5.98   |
| TC001129 | cadherin 23                                                                                     | -2.04 | -1.31 | 4.67    | 1.13   | 1.89   |
| TC009706 | heat shock protein 68a                                                                          | -2.02 | -2.65 | 4.47    | 1.10   | 0.71   |
| TC003081 | serine protease H42                                                                             | -1.99 | -2.35 | 47.56   | 11.94  | 9.36   |
| TC003047 | neuropeptide-like 3 isoform X2                                                                  | -1.99 | -2.64 | 1418.72 | 356.48 | 228.13 |
| TC008099 | protein ovo isoform X2                                                                          | -1.97 | -2.39 | 103.39  | 26.47  | 19.77  |
| TC015152 | Arylsulfatase B-like Protein                                                                    | -1.94 | -2.63 | 66.70   | 17.38  | 10.75  |
| TC010578 | Putative fatty acyl-CoA reductase CG5065-like Protein                                           | -1.93 | -2.33 | 56.69   | 14.84  | 11.28  |
| TC006736 | Eukaryotic translation initiation factor 3 subunit I-like Protein                               | -1.87 | -2.06 | 213.94  | 58.65  | 51.24  |
| TC010791 | Deoxynucleoside kinase-like Protein                                                             | -1.85 | -2.17 | 18.35   | 5.09   | 4.09   |
| TC012577 | Histone H3-like Protein                                                                         | -1.84 | -2.08 | 28.63   | 8.00   | 6.75   |
| TC012621 | 26S proteasome non-ATPase regulatory subunit 11-like Protein                                    | -1.83 | -2.53 | 595.64  | 167.09 | 103.17 |
| TC009480 | histidine-rich glycoprotein                                                                     | -1.81 | -4.57 | 1132.49 | 322.03 | 47.70  |
| TC009808 | putative beta-hexosaminidase fdl-like Protein                                                   | -1.78 | -2.37 | 213.65  | 62.39  | 41.20  |
| TC015693 | Sarcoplasmic calcium-binding protein-like Protein                                               | -1.71 | -2.30 | 40.61   | 12.43  | 8.25   |



|          |                                                                       |       |       |         |        |        |
|----------|-----------------------------------------------------------------------|-------|-------|---------|--------|--------|
| TC002785 | serine protease P40                                                   | -1.70 | -3.41 | 21.80   | 6.69   | 2.05   |
| TC006471 | Very long-chain-fatty-acid--CoA ligase bubblegum-like Protein         | -1.70 | -1.75 | 107.30  | 32.99  | 31.82  |
| TC005701 | Protein white-like Protein                                            | -1.61 | -2.05 | 38.42   | 12.59  | 9.26   |
| TC011052 | Angiotensin-converting enzyme-like Protein                            | -1.54 | -2.31 | 1014.06 | 347.79 | 204.06 |
| TC007265 | altered inheritance of mitochondria protein 3-like [Aethina tumida]   | -1.52 | -2.26 | 56.87   | 19.81  | 11.86  |
| TC001909 | ————                                                                  | -1.51 | -2.09 | 19.22   | 6.75   | 4.52   |
| TC010028 | A disintegrin and metalloproteinase with thrombospondin motifs 7-like | -1.45 | -2.34 | 18.10   | 6.64   | 3.59   |
| TC000601 | Venom allergen 3-like Protein                                         | -1.44 | -2.01 | 583.69  | 214.86 | 145.36 |
| TC012152 | Lipase member H-A-like Protein                                        | -1.44 | -2.53 | 13.88   | 5.12   | 2.41   |
| TC002709 | Apoptosis 2 inhibitor-like Protein                                    | -1.44 | -2.22 | 31.23   | 11.53  | 6.69   |
| TC011635 | Lipase 1-like Protein                                                 | -1.42 | -2.43 | 41.34   | 15.43  | 7.68   |
| TC010429 | Protein O-mannosyltransferase 1-like Protein                          | -1.41 | -2.30 | 51.87   | 19.53  | 10.50  |
| TC014544 | G2/mitotic-specific cyclin-B-like Protein                             | -1.39 | -2.91 | 12.08   | 4.60   | 1.60   |
| TC005411 | Beta-glucuronidase-like Protein                                       | -1.36 | -2.37 | 61.06   | 23.76  | 11.80  |
| TC013108 | Villin-like protein quail                                             | -1.34 | -2.49 | 11.34   | 4.47   | 2.02   |
| TC005142 | putative RNA-directed DNA polymerase from transposon BS-like Protein  | -1.33 | -2.31 | 17.46   | 6.93   | 3.52   |
| TC010547 | Myosin-VIIa-like Protein                                              | -1.31 | -2.08 | 31.72   | 12.79  | 7.48   |
| TC014023 | polo                                                                  | -1.29 | -2.86 | 14.94   | 6.12   | 2.06   |
| TC000269 | BTB/POZ domain-containing protein kctd15-like Protein                 | -1.27 | -2.06 | 17.21   | 7.12   | 4.13   |
| TC013030 | Nepriylsin-2-like Protein                                             | -1.27 | -2.36 | 273.80  | 113.24 | 53.37  |
| TC013713 | DNA replication licensing factor Mcm7-like Protein                    | -1.25 | -2.04 | 30.30   | 12.72  | 7.39   |
| TC013090 | myosin-9 isoform X2                                                   | -1.23 | -2.14 | 192.46  | 82.00  | 43.69  |
| TC016058 | trithorax group protein osa-like [Anoplophora glabripennis]           | -1.20 | -2.52 | 12.74   | 5.55   | 2.22   |
| TC007059 | Ankyrin repeat and BTB/POZ domain-containing protein 2-like Protein   | -1.04 | -2.17 | 9.05    | 4.39   | 2.01   |
